# Supplementary material for: Tracking development assistance for health to fragile states: 2005–2011
Source: PubMed Central journal article supplement (PMC4381367; doi:10.1186/s12992-015-0097-9), 2015-03-19
Supplement: 12992_2015_97_MOESM1_ESM.pdf [file 12992_2015_97_MOESM1_ESM.pdf]

Tracking development assistance for health to fragile states: 2005-2011

Authors: Casey Graves, Annie Haakenstad, Joseph L Dieleman

**Additional file 1. Table S1: Fragile States Index classifications of 141 countries, 2005-2011**

0 = stable, 1 = fragile. HIC indicates the country is classified as high income.

A dash indicates the country was not included in the Fragile States Index and is, by default, considered stable.

| Country                  | 2005 | 2006 | 2007 | 2008 | 2009 | 2010 | 2011 |
|--------------------------|------|------|------|------|------|------|------|
| Afghanistan              | 1    | 1    | 1    | 1    | 1    | 1    | 1    |
| Albania                  | -    | 0    | 0    | 0    | 0    | 0    | 0    |
| Algeria                  | 0    | 0    | 0    | 0    | 0    | 0    | 0    |
| Angola                   | 0    | 0    | 0    | 0    | 0    | 0    | 0    |
| Antigua & Barbuda        | HIC  | HIC  | HIC  | HIC  | 0    | 0    | 0    |
| Argentina                | -    | 0    | 0    | 0    | 0    | 0    | 0    |
| Armenia                  | -    | 0    | 0    | 0    | 0    | 0    | 0    |
| Azerbaijan               | 0    | 0    | 0    | 0    | 0    | 0    | 0    |
| Bangladesh               | 1    | 1    | 1    | 1    | 1    | 1    | 1    |
| Barbados                 | -    | HIC  | HIC  | HIC  | HIC  | HIC  | HIC  |
| Belarus                  | 0    | 0    | 0    | 0    | 0    | 0    | 0    |
| Belize                   | -    | -    | 0    | 0    | 0    | 0    | 0    |
| Benin                    | -    | 0    | 0    | 0    | 0    | 0    | 0    |
| Bhutan                   | 1    | 0    | 0    | 0    | 0    | 0    | 0    |
| Bolivia                  | -    | 0    | 0    | 0    | 0    | 0    | 0    |
| Bosnia & Herzegovina     | 1    | 0    | 0    | 0    | 0    | 0    | 0    |
| Botswana                 | -    | 0    | 0    | 0    | 0    | 0    | 0    |
| Brazil                   | 0    | 0    | 0    | 0    | 0    | 0    | 0    |
| Bulgaria                 | -    | 0    | 0    | 0    | 0    | 0    | 0    |
| Burkina Faso             | -    | 0    | 0    | 0    | 1    | 1    | 0    |
| Burundi                  | 1    | 1    | 1    | 1    | 1    | 1    | 1    |
| Cambodia                 | -    | 0    | 0    | 0    | 0    | 0    | 0    |
| Cameroon                 | 0    | 0    | 0    | 1    | 1    | 1    | 1    |
| Cape Verde               | -    | -    | 0    | 0    | 0    | 0    | 0    |
| Central African Republic | 1    | 1    | 1    | 1    | 1    | 1    | 1    |
| Chad                     | 1    | 1    | 1    | 1    | 1    | 1    | 1    |
| Chile                    | -    | 0    | 0    | 0    | 0    | 0    | 0    |
| China                    | 0    | 0    | 0    | 0    | 0    | 0    | 0    |
| Colombia                 | 1    | 1    | 0    | 0    | 0    | 0    | 0    |
| Comoros                  | -    | -    | 0    | 0    | 0    | 0    | 0    |
| Congo                    | -    | -    | 1    | 1    | 1    | 1    | 1    |
| Congo, DRC               | 1    | 1    | 1    | 1    | 1    | 1    | 1    |
| Costa Rica               | -    | 0    | 0    | 0    | 0    | 0    | 0    |
| Cote d'Ivoire            | 1    | 1    | 1    | 1    | 1    | 1    | 1    |
| Croatia                  | -    | 0    | 0    | HIC  | HIC  | HIC  | HIC  |
| Cuba                     | 0    | 0    | 0    | 0    | 0    | 0    | 0    |
| Djibouti                 | -    | -    | 0    | 0    | 0    | 0    | 0    |
| Dominican Republic       | 1    | 0    | 0    | 0    | 0    | 0    | 0    |
| Ecuador                  | 0    | 0    | 0    | 0    | 0    | 0    | 0    |
| Egypt                    | 0    | 0    | 0    | 0    | 0    | 0    | 0    |
| El Salvador              | 0    | 0    | 0    | 0    | 0    | 0    | 0    |
| Equatorial Guinea        | 1    | 0    | HIC  | HIC  | HIC  | HIC  | HIC  |
| Eritrea                  | 0    | 0    | 0    | 0    | 1    | 1    | 1    |
| Estonia                  | -    | HIC  | HIC  | HIC  | HIC  | HIC  | HIC  |
| Ethiopia                 | 1    | 1    | 1    | 1    | 1    | 1    | 1    |
| Fiji                     | -    | -    | 0    | 0    | 0    | 0    | 0    |
| Gabon                    | -    | 0    | 0    | 0    | 0    | 0    | 0    |
| Georgia                  | -    | 0    | 0    | 0    | 1    | 1    | 0    |
| Ghana                    | -    | 0    | 0    | 0    | 0    | 0    | 0    |
| Grenada                  | -    | -    | 0    | 0    | 0    | 0    | 0    |
| Guatemala                | 1    | 0    | 0    | 0    | 0    | 0    | 0    |
| Guinea                   | 1    | 1    | 1    | 1    | 1    | 1    | 1    |
| Guinea-Bissau            | -    | 0    | 0    | 1    | 1    | 1    | 1    |
| Guyana                   | -    | -    | 0    | 0    | 0    | 0    | 0    |
| Haiti                    | 1    | 1    | 1    | 1    | 1    | 1    | 1    |
| Honduras                 | 0    | 0    | 0    | 0    | 0    | 0    | 0    |

|                     |   |   |     |     |     |     |     |
|---------------------|---|---|-----|-----|-----|-----|-----|
| Hungary             | - | 0 | HIC | HIC | HIC | HIC | HIC |
| India               | 0 | 0 | 0   | 0   | 0   | 0   | 0   |
| Indonesia           | 0 | 0 | 0   | 0   | 0   | 0   | 0   |
| Iran                | 0 | 0 | 0   | 0   | 0   | 1   | 1   |
| Iraq                | 1 | 1 | 1   | 1   | 1   | 1   | 1   |
| Jamaica             | - | 0 | 0   | 0   | 0   | 0   | 0   |
| Jordan              | - | 0 | 0   | 0   | 0   | 0   | 0   |
| Kazakhstan          | 0 | 0 | 0   | 0   | 0   | 0   | 0   |
| Kenya               | 1 | 0 | 1   | 1   | 1   | 1   | 1   |
| Kyrgyzstan          | 0 | 1 | 0   | 0   | 0   | 0   | 1   |
| Laos                | 1 | 0 | 0   | 0   | 0   | 0   | 0   |
| Latvia              | - | 0 | 0   | 0   | HIC | 0   | 0   |
| Lebanon             | 0 | 0 | 1   | 1   | 1   | 1   | 0   |
| Lesotho             | - | - | 0   | 0   | 0   | 0   | 0   |
| Liberia             | 1 | 1 | 1   | 1   | 1   | 1   | 1   |
| Libya               | 0 | 0 | 0   | 0   | 0   | 0   | 0   |
| Lithuania           | - | 0 | 0   | 0   | 0   | 0   | 0   |
| Macedonia           | - | 0 | 0   | 0   | 0   | 0   | 0   |
| Madagascar          | - | - | 0   | 0   | 0   | 0   | 0   |
| Malawi              | - | 0 | 1   | 1   | 1   | 1   | 1   |
| Malaysia            | 0 | 0 | 0   | 0   | 0   | 0   | 0   |
| Maldives            | - | - | 0   | 0   | 0   | 0   | 0   |
| Mali                | - | 0 | 0   | 0   | 0   | 0   | 0   |
| Mauritania          | - | 0 | 0   | 0   | 0   | 0   | 0   |
| Mauritius           | - | 0 | 0   | 0   | 0   | 0   | 0   |
| Mexico              | 0 | 0 | 0   | 0   | 0   | 0   | 0   |
| Micronesia          | - | - | 0   | 0   | 0   | 0   | 0   |
| Moldova             | - | 0 | 0   | 0   | 0   | 0   | 0   |
| Mongolia            | - | 0 | 0   | 0   | 0   | 0   | 0   |
| Montenegro          | - | - | 0   | 0   | 0   | 0   | 0   |
| Morocco             | 0 | 0 | 0   | 0   | 0   | 0   | 0   |
| Mozambique          | 0 | 0 | 0   | 0   | 0   | 0   | 0   |
| Myanmar             | 1 | 1 | 1   | 1   | 1   | 1   | 1   |
| Namibia             | - | 0 | 0   | 0   | 0   | 0   | 0   |
| Nepal               | 0 | 1 | 1   | 1   | 1   | 1   | 1   |
| Nicaragua           | - | 0 | 0   | 0   | 0   | 0   | 0   |
| Niger               | - | 0 | 1   | 1   | 1   | 1   | 1   |
| Nigeria             | 0 | 1 | 1   | 1   | 1   | 1   | 1   |
| North Korea         | 1 | 1 | 1   | 1   | 1   | 1   | 1   |
| Oman                | - | 0 | HIC | HIC | HIC | HIC | HIC |
| Pakistan            | 0 | 1 | 1   | 1   | 1   | 1   | 1   |
| Palestine           | - | - | -   | -   | 0   | 0   | 0   |
| Panama              | - | 0 | 0   | 0   | 0   | 0   | 0   |
| Papua New Guinea    | - | 0 | 0   | 0   | 0   | 0   | 0   |
| Paraguay            | 0 | 0 | 0   | 0   | 0   | 0   | 0   |
| Peru                | 0 | 0 | 0   | 0   | 0   | 0   | 0   |
| Philippines         | 0 | 0 | 0   | 0   | 0   | 0   | 0   |
| Poland              | - | 0 | 0   | 0   | HIC | HIC | HIC |
| Romania             | - | 0 | 0   | 0   | 0   | 0   | 0   |
| Russia              | 0 | 0 | 0   | 0   | 0   | 0   | 0   |
| Rwanda              | 1 | 1 | 0   | 0   | 0   | 0   | 1   |
| Samoa               | - | - | 0   | 0   | 0   | 0   | 0   |
| Sao Tome & Principe | - | - | 0   | 0   | 0   | 0   | 0   |
| Senegal             | - | 0 | 0   | 0   | 0   | 0   | 0   |
| Serbia              | - | - | 0   | 0   | 0   | 0   | 0   |
| Seychelles          | - | - | 0   | 0   | 0   | 0   | 0   |
| Sierra Leone        | 1 | 1 | 1   | 1   | 1   | 1   | 1   |
| Slovakia            | - | 0 | HIC | HIC | HIC | HIC | HIC |
| Solomon Is.         | - | - | 1   | 1   | 0   | 0   | 0   |
| Somalia             | 1 | 1 | 1   | 1   | 1   | 1   | 1   |
| South Africa        | - | 0 | 0   | 0   | 0   | 0   | 0   |
| Sri Lanka           | 0 | 1 | 1   | 1   | 1   | 1   | 1   |
| Sudan               | 1 | 1 | 1   | 1   | 1   | 1   | 1   |
| Suriname            | - | - | 0   | 0   | 0   | 0   | 0   |
| Swaziland           | - | - | 0   | 0   | 0   | 0   | 0   |
| Syria               | 1 | 0 | 0   | 1   | 0   | 0   | 0   |
| Tajikistan          | 0 | 0 | 0   | 0   | 1   | 0   | 0   |

|                             |           |           |           |           |           |           |           |
|-----------------------------|-----------|-----------|-----------|-----------|-----------|-----------|-----------|
| Tanzania                    | 1         | 0         | 0         | 0         | 0         | 0         | 0         |
| Thailand                    | 0         | 0         | 0         | 0         | 0         | 0         | 0         |
| The Gambia                  | 0         | 0         | 0         | 0         | 0         | 0         | 0         |
| Timor Leste                 | -         | -         | 1         | 1         | 1         | 1         | 1         |
| Togo                        | 0         | 0         | 0         | 0         | 0         | 0         | 0         |
| Trinidad & Tobago           | -         | HIC       | HIC       | HIC       | HIC       | HIC       | HIC       |
| Tunisia                     | 0         | 0         | 0         | 0         | 0         | 0         | 0         |
| Turkey                      | 0         | 0         | 0         | 0         | 0         | 0         | 0         |
| Turkmenistan                | 0         | 0         | 0         | 0         | 0         | 0         | 0         |
| Uganda                      | 1         | 1         | 1         | 1         | 1         | 1         | 1         |
| Ukraine                     | 0         | 0         | 0         | 0         | 0         | 0         | 0         |
| Uruguay                     | -         | 0         | 0         | 0         | 0         | 0         | 0         |
| Uzbekistan                  | 1         | 1         | 1         | 1         | 1         | 1         | 0         |
| Venezuela                   | 1         | 0         | 0         | 0         | 0         | 0         | 0         |
| Vietnam                     | 0         | 0         | 0         | 0         | 0         | 0         | 0         |
| Yemen                       | 1         | 1         | 1         | 1         | 1         | 1         | 1         |
| Zambia                      | -         | 0         | 0         | 0         | 0         | 0         | 0         |
| Zimbabwe                    | 1         | 1         | 1         | 1         | 1         | 1         | 1         |
| <b>Total fragile states</b> | <b>33</b> | <b>28</b> | <b>32</b> | <b>35</b> | <b>37</b> | <b>37</b> | <b>35</b> |
